# Supplementary material for: Short Tandem Repeats (STRs) as Biomarkers for the Quantitative Follow-Up of Chimerism after Stem Cell Transplantation: Methodological Considerations and Clinical Application
Source: PubMed Central journal article supplement (PMC7565503; doi:10.3390/genes11090993), 2020-08-25
Supplement: genes-11-00993-s001.pdf [file genes-11-00993-s001.pdf]

## Supplementary Information

### **STR polymorphisms used for post-stem cell transplant chimerism quantification.**

The commercial kit used in this study (Mentype®Chimera®, Biotype GmbH, Germany) include highly polymorphic short tandem repeats (STRs) with a very high rate of heterozygosity and a balanced allelic distribution (Thiede et al. 2004). Specifically, one PCR reaction simultaneously amplifies the autosomal loci D2S1360, D3S1744, D4S2366, D5S2500, D6S474, D7S1517, D8S1132, D10S2325, D12S391, D18S51, D21S2055, SE33 (ACTBP2), and the gender-specific locus Amelogenin (detailed in Supplementary Table S1).

| Locus         | GenBank accession | Repeat motif of the reference allele                                                                                                        | Reference allele | Allele range | Chromosomal Mapping |
|---------------|-------------------|---------------------------------------------------------------------------------------------------------------------------------------------|------------------|--------------|---------------------|
| D2S1360       | G08130            | [TATC] <sub>9</sub> [TGTC] <sub>9</sub> [TATC] <sub>5</sub>                                                                                 | 23               | 19-32        | 2p24-p22            |
| D3S1744       | G08246            | [TCTA] <sub>2</sub> TA[TCTA] <sub>12</sub> TCA [TCTA] <sub>2</sub>                                                                          | 16               | 13-22        | 3p24                |
| D4S2366       | G08339            | [ATAG] <sub>9</sub> ATTG [ATAG] <sub>2</sub>                                                                                                | 12               | 9-15         | 4p16-15.2           |
| D5S2500       | G08468            | [ATAG] <sub>12</sub>                                                                                                                        | 12               | 9-18         | 5q11.2              |
| D6S474        | G08540            | [TAGA] <sub>5</sub> TGA [TAGA] <sub>12</sub>                                                                                                | 17               | 11-20        | 6q21-22             |
| D7S1517       | G18365            | [GAAA] <sub>11</sub> CAAA [GAAA] <sub>2</sub> CAAA [GAAA] <sub>2</sub>                                                                      | 17               | 14-31        | 7q31.33             |
| D8S1132       | G08685            | [TCTA] <sub>9</sub> TCA [TCTA] <sub>9</sub> TCTGTCTA                                                                                        | 20               | 12.1-27      | 8q23.1              |
| D10S2325      | G08790            | [TCTTA] <sub>12</sub>                                                                                                                       | 12               | 6-23         | 10p12               |
| D12S391       | G08921            | [AGAT] <sub>5</sub> GAT [AGAT] <sub>7</sub> [AGAC] <sub>6</sub> AGAT                                                                        | 19.3             | 13-28        | 12p13.2             |
| D18S51        | L18333            | [AGAA] <sub>13</sub>                                                                                                                        | 13               | 5.3-42       | 18q21.3             |
| D21S2055      | G27274            | [CTAT] <sub>2</sub> CTAA [CTAT] <sub>9</sub> CTA [CTAT] <sub>3</sub> TAT [CTAT] <sub>3</sub> TAT [CTAT] <sub>4</sub> CAT[CTAT] <sub>2</sub> | 24               | 16.1-39      | 21q22               |
| SE33 (ACTBP2) | NG000840          | [AAAG] <sub>9</sub> AA [AAAG] <sub>16</sub>                                                                                                 | 25.2             | 3-50         | 6q14.2              |
| Amelogenin X  | M55418            |                                                                                                                                             |                  |              | Xp22.1-22.3         |
| Amelogenin Y  | M55419            |                                                                                                                                             |                  |              | Yp11.2              |

**Supplementary Table S1.-** STR loci used for STR-PCR analysis. Detailed information on the STR loci used for chimerism quantification in the present study. For further information refer to the Instructions for Use of Mentype®Chimera® (available on [www.biotype.de](http://www.biotype.de)).

### References

Thiede C, Bornhäuser M and Ehninger G. Evaluation of STR informativity for chimerism testing – comparative analysis of 27 STR systems in 203 matched related donor recipient pairs. *Leukemia*. 2004, 18, 248–254. doi:10.1038/sj.leu.2403212.

**Supplementary Table S2.**

| BM      |   | qPCR |    |
|---------|---|------|----|
|         |   | +    | -  |
| STR-PCR | + | 9    | 0  |
|         | - | 57   | 16 |

| PB      |   | qPCR |    |
|---------|---|------|----|
|         |   | +    | -  |
| STR-PCR | + | 12   | 0  |
|         | - | 15   | 40 |

**Supplementary Table S2.-** Concordance of positive and negative results by STR-PCR and qPCR in PB and in BM samples. Positive (presence of recipient DNA, MC) and negative (absence of recipient DNA, CC) results by STR-PCR and qPCR in BM (left panel, n=82), and PB (right panel, n=67) samples. Of note, the proportion of positive samples by qPCR that are negative by STR-PCR is higher in BM (57/82, 70%) than in PB samples (15/67, 22%).

**Supplementary Figure S1.**

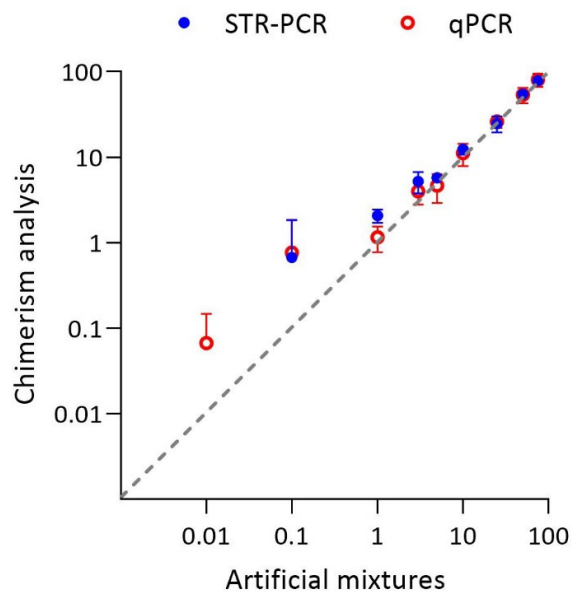

**Supplementary Figure S1.-** Artificial mixture analysis represented in a logarithmic scale. (A) Results of chimerism quantification using STR-PCR (blue) and qPCR (red), vs. actual percentage of cells of putative recipient (male) are represented using a logarithmic scale.
